# Supplementary material
Source: HighWire-hosted journal article supplement (https://cmaj.ca/highwire/filestream/58670/field_highwire_adjunct_files/0/readmissions-van-app_1.pdf)
Supplement: readmissions-van-app_1.pdf [file readmissions-van-app_1.pdf]

**Appendix 1 (as supplied by the authors):** Description of scales used by physician reviewers to rate readmission causation and “avoidability”

| RATING | CAUSATION                                           | “AVOIDABILITY”                                |
|--------|-----------------------------------------------------|-----------------------------------------------|
| 1      | No evidence for management causation                | No evidence for preventability                |
| 2      | Slight evidence for management causation            | Slight evidence for preventability            |
| 3      | Management causation less than 50–50 but close call | Preventability less than 50–50 but close call |
| 4      | Management causation more than 50–50 but close call | Preventability more than 50–50 but close call |
| 5      | Strong evidence for management causation            | Strong evidence for preventability            |
| 6      | Virtually certain evidence for management causation | Virtually certain evidence for preventability |

For each domain, a rating of 4 or more indicated that the reviewer felt that evidence existed for causation or avoidability in that case.
